# Supplementary material for: Honey bee foraging ecology: Season but not landscape diversity shapes the amount and diversity of collected pollen
Source: PubMed Central journal article supplement (PMC5576699; doi:10.1371/journal.pone.0183716), 2017-08-30
Supplement: pone.0183716.s002.pdf [file pone.0183716.s002.pdf]

**Table S1:** List of species, sorted by relative abundance over all samples. All species had an abundance of >1% within the samples in which they occurred.

| <b>Genus</b>       | <b>Species</b>        | <b>Abundance [%]</b> |
|--------------------|-----------------------|----------------------|
| <i>Brassica</i>    | <i>napus</i>          | 48.38                |
| <i>Papaver</i>     | <i>rhoeas</i>         | 6.43                 |
| <i>Picris</i>      | <i>hieracioides</i>   | 6.16                 |
| <i>Centaurea</i>   | <i>jacea</i>          | 4.91                 |
| <i>Alyssum</i>     | <i>murale</i>         | 2.65                 |
| <i>Potentilla</i>  | <i>micrantha</i>      | 2.04                 |
| <i>Trifolium</i>   | <i>pratense</i>       | 1.96                 |
| <i>Cirsium</i>     | <i>palustre</i>       | 1.67                 |
| <i>Trifolium</i>   | <i>repens</i>         | 1.56                 |
| <i>Vicia</i>       | <i>lathyroides</i>    | 1.49                 |
| <i>Sisymbrium</i>  | <i>irio</i>           | 1.26                 |
| <i>Filipendula</i> | <i>ulmaria</i>        | 1.22                 |
| <i>Crepis</i>      | <i>vesicaria</i>      | 1.07                 |
| <i>Trifolium</i>   | <i>hybridum</i>       | 0.94                 |
| <i>Potentilla</i>  | <i>reptans</i>        | 0.8                  |
| <i>Hypericum</i>   | <i>perforatum</i>     | 0.71                 |
| <i>Trifolium</i>   | <i>striatum</i>       | 0.63                 |
| <i>Plantago</i>    | <i>major</i>          | 0.62                 |
| <i>Heracleum</i>   | <i>mantegazzianum</i> | 0.61                 |
| <i>Lepidium</i>    | <i>perfoliatum</i>    | 0.6                  |
| <i>Prunus</i>      | <i>avium</i>          | 0.57                 |
| <i>Sisymbrium</i>  | <i>officinale</i>     | 0.56                 |
| <i>Malus</i>       | <i>domestica</i>      | 0.55                 |
| <i>Potentilla</i>  | <i>clusiana</i>       | 0.51                 |
| <i>Arctium</i>     | <i>tomentosum</i>     | 0.49                 |
| <i>Brassica</i>    | <i>nigra</i>          | 0.4                  |
| <i>Barbarea</i>    | <i>vulgaris</i>       | 0.34                 |
| <i>Melilotus</i>   | <i>officinalis</i>    | 0.3                  |
| <i>Plantago</i>    | <i>lanceolata</i>     | 0.28                 |
| <i>Carthamus</i>   | <i>spec.</i>          | 0.26                 |
| <i>Potentilla</i>  | <i>alba</i>           | 0.25                 |
| <i>Sisymbrium</i>  | <i>austriacum</i>     | 0.22                 |
| <i>Juglans</i>     | <i>regia</i>          | 0.22                 |
| <i>Centaurea</i>   | <i>cyanus</i>         | 0.21                 |
| <i>Mercurialis</i> | <i>annua</i>          | 0.18                 |
| <i>Chenopodium</i> | <i>ficifolium</i>     | 0.18                 |
| <i>Inula</i>       | <i>germanica</i>      | 0.17                 |
| <i>Potentilla</i>  | <i>norvegica</i>      | 0.17                 |
| <i>Neslia</i>      | <i>paniculata</i>     | 0.15                 |
| <i>Quercus</i>     | <i>robur</i>          | 0.13                 |
| <i>Reseda</i>      | <i>lutea</i>          | 0.11                 |
| <i>Potentilla</i>  | <i>caulescens</i>     | 0.11                 |
| <i>Tilia</i>       | <i>platyphyllos</i>   | 0.08                 |
| <i>Lolium</i>      | <i>multiflorum</i>    | 0.07                 |
| <i>Hypochaeris</i> | <i>radicata</i>       | 0.07                 |
| <i>Crataegus</i>   | <i>monogyna</i>       | 0.06                 |
| <i>Elymus</i>      | <i>repens</i>         | 0.06                 |
| <i>Trifolium</i>   | <i>arvense</i>        | 0.06                 |
| <i>Silene</i>      | <i>vulgaris</i>       | 0.05                 |
| <i>Tragopogon</i>  | <i>pratensis</i>      | 0.05                 |

|                    |                       |      |
|--------------------|-----------------------|------|
| <i>Sisymbrium</i>  | <i>loeselii</i>       | 0.05 |
| <i>Sisymbrium</i>  | <i>strictissimum</i>  | 0.04 |
| <i>Berteroa</i>    | <i>incana</i>         | 0.04 |
| <i>Mercurialis</i> | spec.                 | 0.04 |
| <i>Phalaris</i>    | <i>arundinacea</i>    | 0.04 |
| <i>Senecio</i>     | <i>doronicum</i>      | 0.04 |
| <i>Elymus</i>      | <i>caninus</i>        | 0.04 |
| <i>Quercus</i>     | <i>petraea</i>        | 0.03 |
| <i>Prunus</i>      | <i>domestica</i>      | 0.03 |
| <i>Lathyrus</i>    | <i>pratensis</i>      | 0.03 |
| <i>Aethusa</i>     | <i>cynapium</i>       | 0.03 |
| <i>Conyza</i>      | <i>canadensis</i>     | 0.02 |
| <i>Rosa</i>        | <i>rugosa</i>         | 0.02 |
| <i>Ambrosia</i>    | <i>artemisiifolia</i> | 0.02 |
| <i>Fagus</i>       | <i>sylvatica</i>      | 0.02 |
| <i>Cardamine</i>   | <i>amara</i>          | 0.01 |
| <i>Betula</i>      | <i>nana</i>           | 0.01 |
| <i>Crataegus</i>   | <i>laevigata</i>      | 0.01 |
| <i>Solanum</i>     | <i>nigrum</i>         | 0.01 |
| <i>Ranunculus</i>  | <i>circinatus</i>     | 0.01 |
| <i>Jacobaea</i>    | spec.                 | 0.01 |
| <i>Capsella</i>    | <i>bursa-pastoris</i> | 0    |
| <i>Sonchus</i>     | <i>oleraceus</i>      | 0    |
| <i>Falcaria</i>    | <i>vulgaris</i>       | 0    |
| <i>Daucus</i>      | <i>carota</i>         | 0    |
| <i>Impatiens</i>   | <i>glandulifera</i>   | 0    |
| <i>Lolium</i>      | <i>perenne</i>        | 0    |
| <i>Hypericum</i>   | <i>hirsutum</i>       | 0    |
| <i>Quercus</i>     | spec.                 | 0    |
| <i>Onobrychis</i>  | spec.                 | 0    |

---
