# Supplementary material for: Honey bee foraging ecology: Season but not landscape diversity shapes the amount and diversity of collected pollen
Source: PubMed Central journal article supplement (PMC5576699; doi:10.1371/journal.pone.0183716), 2017-08-30
Supplement: pone.0183716.s005.pdf [file pone.0183716.s005.pdf]

**Table A:** Dry weight - results from multi-model inference.

Component models:

|        | R <sup>2</sup> | df | logLik  | AICc   | delta | weight |
|--------|----------------|----|---------|--------|-------|--------|
| 1      | 0.30           | 9  | -124.65 | 269.39 | 0.00  | 0.78   |
| 12     | 0.30           | 10 | -124.64 | 271.87 | 2.48  | 0.22   |
| 123    | 0.32           | 16 | -123.45 | 285.78 | 16.40 | 0.00   |
| (Null) | 0.00           | 3  | -141.94 | 290.14 | 20.75 | 0.00   |
| 2      | 0.00           | 4  | -141.93 | 292.30 | 22.91 | 0.00   |

Term codes:

| date | landscape_diversity | date:landscape_diversity |
|------|---------------------|--------------------------|
| 1    | 2                   | 3                        |

**Table B:** Richness - results from multi-model inference.

Component models:

|        | R <sup>2</sup> | df | logLik | AICc   | delta | weight |
|--------|----------------|----|--------|--------|-------|--------|
| 1      | 0.43           | 9  | -69.65 | 159.39 | 0.00  | 0.62   |
| 12     | 0.44           | 10 | -68.93 | 160.44 | 1.05  | 0.37   |
| 123    | 0.49           | 16 | -64.67 | 168.22 | 8.84  | 0.01   |
| (Null) | 0.00           | 3  | -96.89 | 200.03 | 40.65 | 0.00   |
| 2      | 0.02           | 4  | -96.11 | 200.67 | 41.28 | 0.00   |

Term codes:

| date | landscape_diversity | date:landscape_diversity |
|------|---------------------|--------------------------|
| 1    | 2                   | 3                        |

**Table C:** Diversity - results from multi-model inference.

Component models:

|        | R <sup>2</sup> | df | logLik | AICc   | delta | weight |
|--------|----------------|----|--------|--------|-------|--------|
| 1      | 0.77           | 15 | -25.24 | 86.49  | 0.00  | 0.78   |
| 12     | 0.77           | 16 | -25.05 | 88.98  | 2.49  | 0.22   |
| 123    | 0.78           | 22 | -22.34 | 102.55 | 16.06 | 0.00   |
| (Null) | 0.49           | 9  | -62.75 | 145.59 | 59.10 | 0.00   |
| 2      | 0.49           | 10 | -62.74 | 148.07 | 61.58 | 0.00   |

Term codes:

| date | landscape_diversity | date:landscape_diversity |
|------|---------------------|--------------------------|
| 1    | 2                   | 3                        |

**Table D:** Foraging distances - results from multi-model inference.

Component models:

|        | R <sup>2</sup> | df | logLik   | AICc    | delta  | weight |
|--------|----------------|----|----------|---------|--------|--------|
| 123    | 0.30           | 17 | -1594.17 | 3222.79 | 0.00   | 0.97   |
| 12     | 0.30           | 11 | -1603.98 | 3230.16 | 7.37   | 0.02   |
| 2      | 0.28           | 10 | -1606.89 | 3233.95 | 11.15  | 0.00   |
| 1      | 0.23           | 5  | -1655.62 | 3321.28 | 98.49  | 0.00   |
| (Null) | 0.23           | 4  | -1657.77 | 3323.57 | 100.77 | 0.00   |

Term codes:

| landscape_diversity | round | landscape_diversity:round |
|---------------------|-------|---------------------------|
| 1                   | 2     | 3                         |
